# Supplementary material for: Archaeosomes based on novel synthetic tetraether-type lipids for the development of oral delivery systems
Source: Royal Society of Chemistry journal article supplement (doi:10.1039/b511440c), 2005-01-01
Supplement: b511440c.pdf [file b511440c.pdf]

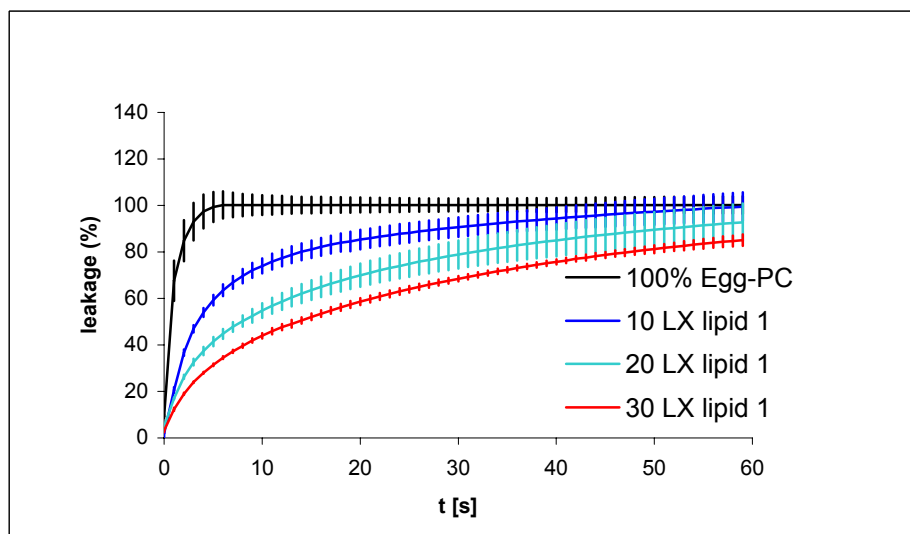

(a)

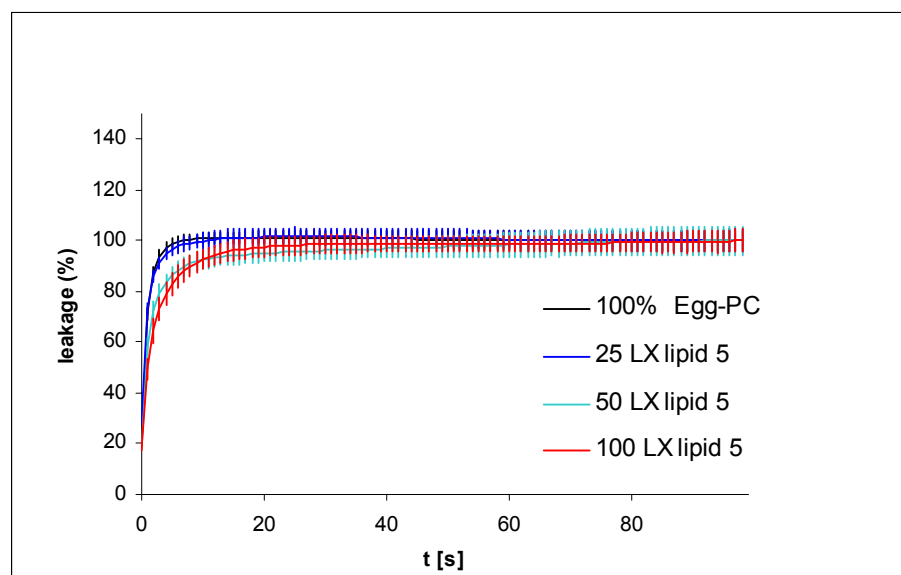

(b)

Percent leakage of encapsulated CF from liposomes prepared from (a) increasing proportions of lipid **1**, (b) increasing proportions of lipid **5**, in a 0.4% sodium cholate KRB buffer solution, 37°C, pH 7.4 (in comparison with conventional 100% Egg-PC liposomes).

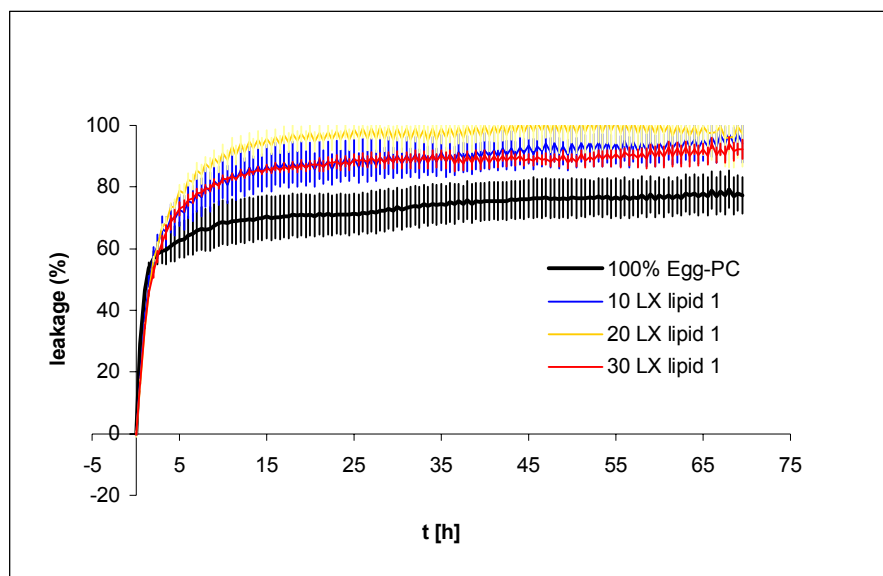

(a)

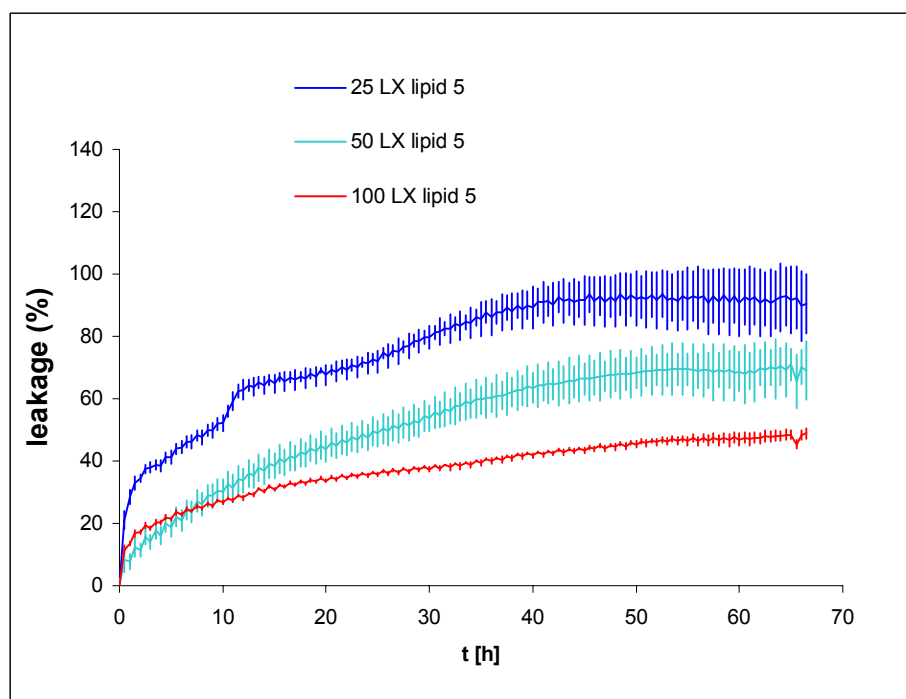

(b)

Percent leakage of encapsulated CF from liposomes prepared from increasing proportions of (a) lipid 1 and (b) lipid 5 upon exposure (37°C) to fetal bovine serum.
